# Supplementary material for: Implementation of a Zebrafish Health Program in a Research Facility: A 4-Year Retrospective Study
Source: PubMed Central journal article supplement (PMC4931741; doi:10.1089/zeb.2015.1230), 2016-07-01
Supplement: Supp_Data.pdf [file Supp_Data.pdf]

# Supplementary Data

## Diets and Feeding Regime

Zebrafish are fed with a combination of live and processed feeds. Live feeds comprise *Paramecium caudatum* and decapsulated *Artemia salina*. *A. salina* dehydrated cysts (Brine Shrimp Cysts, Basic 230, Grade 6 from Zebrafish Management Ltd.) are decapsulated by bleach, according to the Zebrafish International Resource Center (ZIRC) protocol, available in <https://zebrafish.org/documents/protocols.php>. *P. caudatum* culture has been maintained in-house since 2009 following the protocol described in Nusslein-Volhard and Dahm.<sup>1</sup> Processed diets consist of Mucedola 0.2–0.3 (Mucedola<sup>®</sup>) and Gemma Micro 300 (Skreting<sup>®</sup>). Larvae between 5–8 days post-fertilization (dpf) are fed once a day with *P. caudatum* and twice a day with Mucedola 0.2–0.3. Larvae from 8 to 20 dpf are fed thrice a day; twice with live feeds (progressively weaned of *P. caudatum*, while gradually increasing decapsulated *A. salina*) and supplemented once a day with dry feed Mucedola 0.2–0.3. From 20 to 90 dpf, animals are fed twice a day with *A. salina* and once a day with dry food (Mucedola 0.2–0.3 until 30 dpf and Gemma micro 300 onward). Adult fish are fed once a day with *A. salina* and once with Gemma micro 300 (active breeders are fed thrice/day). Fish are fed to satiation.<sup>2</sup> Mucedola composition is as follows: 56% crude protein, 13.5% crude oil and fats, 0.5% crude fibers, 10.5% crude ash, 1.8% phosphorus, 2.9% calcium, and 0.9% sodium. Gema Micro composition is as follows: 55% protein, 15% lipids, 13.5% ash, 5% fiber, 2% phosphorus, and 14.3% total n-3 HUFA of fat.

## Animal Density and Nursery

Zebrafish lifestages are defined as larval from 2 to 30 dpf; juvenile from 30 dpf until 90 dpf, a time point when most animals have reached sexual maturation; and adults from 90 dpf onward. Larvae are reared at a density of 10–12 fish/L and juvenile and adult fish at 5–10 fish/L.<sup>3,4</sup> The main recirculating system has a dedicated area for nursery where larvae are housed until they become adults. At 5 dpf, larvae are transferred from Petri dishes to 3.5 L tanks filed with 500 mL homemade E3 medium, fed with 1–2 mL/larvae of *P. caudatum*, and placed in static conditions for 24 h.<sup>1</sup> On the following day, the flow is turned on (1 drop/second) and increased gradually until animals reach juvenile stage. During this period, tanks are gently siphoned once a week with a hose or plastic Pasteur pipette to remove debris.

## DNA Extraction from Suspect *Mycobacterium* spp. Infection Cases

The extraction of total DNA from paraffin-embedded tissues is performed with the High Pure PCR Template Preparation Kit (Roche), following the manufacturer's instructions for this type of samples. A step of mechanical disruption, before applying Proteinase K, is included using a bead-beating protocol (with zirconium beads), consisting of 6.5 ms<sup>-1</sup> cycles for 45 s,

repeated twice, in the FastPrep FP120 Bio101 apparatus (Savant Instruments). Genomic DNA suspensions are stored at –20°C until further use. DNA concentration and purity are estimated by measuring the absorbance at 260 nm (A260) and determining the A260/A280 and A260/A230 ratios, respectively, using a NanoDrop 1000 spectrophotometer (NanoDrop).

## Identification of Mycobacteria to the Species Level by Polymerase Chain Reaction and Restriction Enzyme Analysis

Detection of mycobacteria nucleic acids is performed by polymerase chain reaction (PCR) targeting a 439-bp fragment of the genus-specific gene encoding the 65 kDa heat shock protein (Hsp65). Identification to the species level is completed by restriction fragment length polymorphism analysis using *Bst*EII and *Hae*III restriction enzymes,<sup>5</sup> which allows identification of several tuberculous and nontuberculous (NTM) mycobacterial species. Genomic DNA extracted from purified reference and clinical bacterial strains of *Mycobacterium tuberculosis* complex, identified to the species level,<sup>6</sup> and NTM, are included as positive controls in each PCR assay. A reaction with nuclease-free water instead of DNA template is included as negative control. Another genus-specific PCR with identification to the species level of slow growing and rapidly growing mycobacteria is employed complementarily using the 16S–23S ribosomal RNA gene (rDNA) spacer (Internal Transcribed Spacer, ITS) as target.<sup>7</sup> The speciation algorithm involves the estimation of variable species-specific PCR product sizes (205–318 bp amplicons), together with *Hae*III and *Cfo*I (first step), and additional *Taq*I, *Msp*I, *Dde*I, or *Ava*II (second step) restriction analyses.

## *Mycobacterium* spp. 16S rDNA Amplification by Real-Time PCR

Real-time PCR reactions aiming the amplification of mycobacterial 16S rDNA (149-bp fragment),<sup>8</sup> in a total volume of 20  $\mu$ L containing 1 $\times$  SsoAdvanced Universal Probes Supermix (Bio-Rad), 0.4  $\mu$ M of each primer F\_16SrDNA (5'-CCG CAA GGC TAA AAC TCA AA-3') and R\_16SrDNA (5'-TGC ACA CAG GCC ACA AGG GA-3'), 0.15  $\mu$ M of TaqMan probe P\_16SrDNA (TET-TCG ATG CAA CGC GAA GAA CCT TAC-BHQ1), nuclease-free water (GIBCO), and 5  $\mu$ L of the extracted DNA template. The probe is labeled with tetrachlorofluorescein (TET) fluorophore and BHQ1 quencher. Positive and template-free negative controls are included in each reaction.

The thermal cycling conditions are as follows: 1 cycle at 95°C for 2 min, followed by 45 cycles at 95°C for 5 s and 60°C for 10 s. All samples are tested thrice and considered positive if at least one of the amplification reactions yields positive. Thermal cycling, fluorescent data collection, and data analysis are carried out in a CFX96 (Bio-Rad) detection system real-time PCR instrument.

SUPPLEMENTARY TABLE S1. HEALTH PROGRAM CHECKLIST

|                                              | <i>Test method</i>        |
|----------------------------------------------|---------------------------|
| <b>Signs</b>                                 |                           |
| Abnormal swimming                            | Visual                    |
| Anal prolapsed                               | Visual                    |
| Clamped fins                                 | Visual                    |
| Cutaneous mass                               | Visual                    |
| Distended coelomic cavity                    | Visual                    |
| Distended coelomic cavity + scale protrusion | Visual                    |
| Dorsal scale protrusion                      | Visual                    |
| Dyspnea                                      | Visual                    |
| Emaciation                                   | Visual                    |
| Group mortality                              | Visual                    |
| Negative buoyancy                            | Visual                    |
| Positive buoyancy                            | Visual                    |
| Skin congestion                              | Visual                    |
| Skin hemorrhage                              | Visual                    |
| Spinal curvature                             | Visual                    |
| Subcutaneous emphysema                       | Visual                    |
| <b>Lesions</b>                               |                           |
| Aerocystitis                                 | Necropsy/Histology        |
| AFB negative granuloma                       | Histology                 |
| Branchitis                                   | Histology                 |
| Cardiac dilatation                           | Necropsy/Histology        |
| Cutaneous ulcer                              | Visual/Necropsy/Histology |
| Egg binding                                  | Necropsy/Histology        |
| Exophthalmitis                               | Visual/Necropsy/Histology |
| Gill air emboly                              | Necropsy/Histology        |
| Gill hyperplasia                             | Histology                 |
| Gill telangiectasia/aneurism                 | Necropsy/Histology        |
| Intestinal dilatation                        | Necropsy/Histology        |
| Macroscopic granuloma                        | Necropsy                  |
| Muscle fiber atrophy                         | Histology                 |
| Neoplasia                                    | Histology                 |
| Opaque swim bladder                          | Necropsy                  |
| Ovarian inflammation                         | Histology                 |
| Coelomitis                                   | Necropsy/Histology        |
| Overinflated swim bladder                    | Necropsy/Histology        |
| Splenomegaly                                 | Necropsy/Histology        |
| Supersaturation                              | Necropsy/Histology        |
| Testicular hypertrophy                       | Necropsy/Histology        |
| Thyroid hypertrophy                          | Visual/Necropsy/Histology |
| <b>Pathogens</b>                             |                           |
| <b>Bacteria</b>                              |                           |
| Acid-fast bacteria                           | Histology                 |
| Flavobacter-like-bacteria                    | Necropsy/Histology        |
| Gram negative bacteria                       | Histology                 |
| <b>Parasites</b>                             |                           |
| Capilarid nematodes                          | Necropsy/Histology        |
| Cestodes                                     | Necropsy/Histology        |
| Digenetic trematodes                         | Necropsy/Histology        |
| Ichthyophthirius multifiliis                 | Necropsy/Histology        |
| Monogenetic trematodes                       | Necropsy/Histology        |
| Nematode eggs                                | Necropsy/Histology        |
| Piscinoodinium spp.                          | Necropsy/Histology        |
| Pseudoloma neurophilia                       | Histology                 |
| Tetrahymana spp.                             | Necropsy/Histology        |
| <b>Mycology</b>                              |                           |
| Fungal hyphae                                | Necropsy/Histology        |
| Macroscopic hyphae                           | Visual                    |

Full list of clinical signs, histopathological lesions and pathogens detected by listed methods.  
AFB, acid-fast bacteria.

SUPPLEMENTARY TABLE S2. QUARANTINE PROGRAM RESULTS

|                         |                           | <i>Results</i>             |        |
|-------------------------|---------------------------|----------------------------|--------|
| <i>Clinical finding</i> |                           | <i>#pos/#test freq (%)</i> |        |
| Signs                   | Emaciation                | 10/181                     | 5.5    |
|                         | Abnormal swimming         | 6/181                      | 3.3    |
|                         | Skin hemorrhage           | 4/181                      | 2.2    |
|                         | Spinal curvature          | 4/181                      | 2.2    |
|                         | Dorsal scale protrusion   | 3/181                      | 1.7    |
|                         | Distended coelomic cavity | 2/181                      | 1.1    |
|                         | Group mortality           | 2/181                      | 1.1    |
|                         | Dyspnea                   | 1/181                      | 0.6    |
|                         | Skin congestion           | 1/181                      | 0.6    |
|                         | Positive buoyancy         | 1/181                      | 0.6    |
| Lesions                 | Aerocystitis              | 8/181                      | 4.4    |
|                         | Coelomitis                | 8/181                      | 4.4    |
|                         | Cutaneous ulcer           | 8/181                      | 4.4    |
|                         | Neoplasia                 | 5/131                      | 3.8    |
|                         | AFB negative granuloma    | 3/131                      | 2.3    |
|                         | Intestinal dilatation     | 3/181                      | 1.7    |
|                         | Branchitis                | 2/131                      | 1.5    |
|                         | Muscle fiber atrophy      | 2/131                      | 1.5    |
|                         | Ovarian inflammation      | 2/131                      | 1.5    |
|                         | Gill hyperplasia          | 1/131                      | 0.8    |
|                         | Egg binding               | 1/181                      | 0.6    |
|                         | Gill air emboly           | 1/181                      | 0.6    |
|                         | Pathogens                 | Pseudoloma neurophilia     | 23/131 |
| Acid-fast bacteria      |                           | 8/131                      | 6.1    |
| Fungal hyphae           |                           | 2/181                      | 1.1    |
| Macroscopic hyphae      |                           | 1/181                      | 0.6    |
| Capilarid nematodes     |                           | 1/181                      | 0.6    |
| Nematode eggs           |                           | 1/181                      | 0.6    |

pos, positive; test, tested; freq, frequency.

**Supplementary References**

- Nusslein-Volhard C, Dahm R: Zebrafish: A Practical Approach. Oxford University Press, Oxford, England, 2002.
- Lawrence C. The husbandry of zebrafish (*Danio rerio*): A review. *Aquaculture* 2007;269:1–20.
- Harper C, Lawrence C: The Laboratory Zebrafish. CRC Press, Boca Raton, FL, 2011.
- Castranova D, Lawton A, Lawrence C, Baumann DP, Best J, Coscolla J, *et al*. The Effect of Stocking Densities on Reproductive Performance in Laboratory Zebrafish (*Danio rerio*). *Zebrafish* 2011;8:141–146.
- Telenti A, Marchesi F, Balz M, Bally F, Bottger EC, Bodmer T. Rapid identification of mycobacteria to the species level by polymerase chain reaction and restriction enzyme analysis. *J Clin Microbiol* 1993;31:175–178.
- Cunha MV, Monteiro M, Carvalho P, Mendonça P, Albuquerque T, Botelho A. Multihost tuberculosis: insights from the portuguese control program. *Vet Med Int* 2011;2011:795165.
- Roth A, Reischl U, Streubel A, Naumann L, Kroppenstedt RM, Habicht M, *et al*. Novel diagnostic algorithm for identification of mycobacteria using genus-specific amplification of the 16S-23S rRNA gene spacer and restriction endonucleases. *J Clin Microbiol* 2000;38:1094–1104.
- Costa P, Amaro A, Ferreira AS, Machado D, Albuquerque T, Couto I, *et al*. Rapid identification of veterinary-relevant Mycobacterium tuberculosis complex species using 16S rDNA, IS6110 and Regions of Difference-targeted dual-labelled hydrolysis probes. *J Microbiol Methods* 2014;107:13–22.
